# Supplementary material for: Nutritional Composition and Safety Aspects of Deep-Sea Whelks (Buccinum tenuissimum Kuroda)
Source: MDPI journal article supplement (doi:10.3390/foods13081169), 2024-04-11
Supplement: s1 [file s1]

## Article

# Nutritional Composition and Safety Aspects of Deep-Sea Whelks (*Buccinum tenuissimum* Kuroda)

Sana Mansoor <sup>1,†</sup>, Jin-Hwa Lee <sup>1,†</sup>, Khawaja Muhammad Imran Bashir <sup>1,2</sup>, Jae-Hak Sohn <sup>3,\*</sup> and Jae-Suk Choi <sup>1,\*</sup>

<sup>1</sup> Department of Seafood Science and Technology, Institute of Marine Industry, Gyeongsang National University, Tongyeong 53064, Republic of Korea; sanamansoorahmad@gmail.com (S.M.); evolution\_5237@gnu.ac.kr (J.-H.L.); imranbashir@gnu.ac.kr (K.M.I.B.)

<sup>2</sup> German Engineering Research and Development Center for Life Science Technologies in Medicine and Environment, Busan 46742, Republic of Korea

<sup>3</sup> Department of Food Science and Culinary Arts, College of Health and Welfare, Silla University, Busan 46958, Republic of Korea

\* Correspondence: jhsohn@silla.ac.kr (J.-H.S.); jsc1008@gnu.ac.kr (J.-S.C.); Tel.: +82-51-999-5629 (J.-H.S.); +82-55-772-9142 (J.-S.C.)

† These authors contributed equally to this work.

**Table S1.** Analytical conditions of ICP spectrometer used for heavy metal analysis.

| Parameter                          | Condition    |
|------------------------------------|--------------|
| RF power                           | 1350 W       |
| Nebulizer flush pump rate (rpm)    | 100          |
| Nebulizer analysis pump rate (rpm) | 100          |
| Nebulizer pump relaxation time     | 5 sec        |
| Flush time                         | 30 sec       |
| Rinse time                         | 10 sec       |
| Stabilization time                 | 30 sec       |
| Nebulizer flow                     | 0.61 L/min   |
| Auxiliary gas                      | 1.00 L/min   |
| Light source                       | ICAP         |
| Pump tubing type                   | tygon-orange |

ICP: Inductively coupled plasma; RF: Radio frequency; ICAP: White LED light.
